# Supplementary material for: Low-dimensional functional networks of cage-like B40 with effective transition-metal intercalations
Source: Royal Society of Chemistry journal article supplement (doi:10.1039/c9cp03252e), 2019-01-01
Supplement: c9cp03252e1.pdf [file c9cp03252e1.pdf]

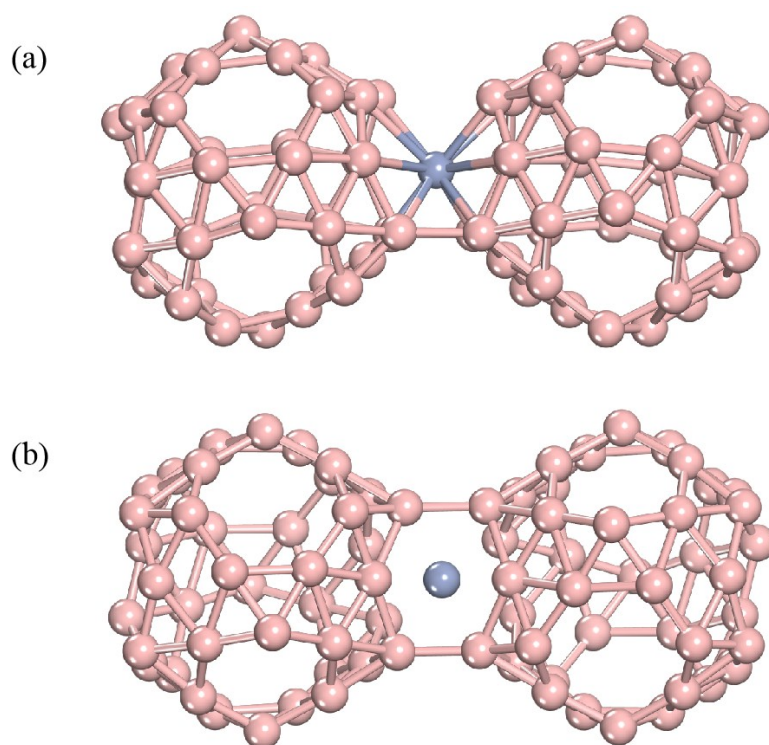

**Figure S1.** Optimized geometric structure of  $7_3\perp 7_1$   $B_{40}$  dimer intercalated by Cr atom (a) top view, (b) side view.

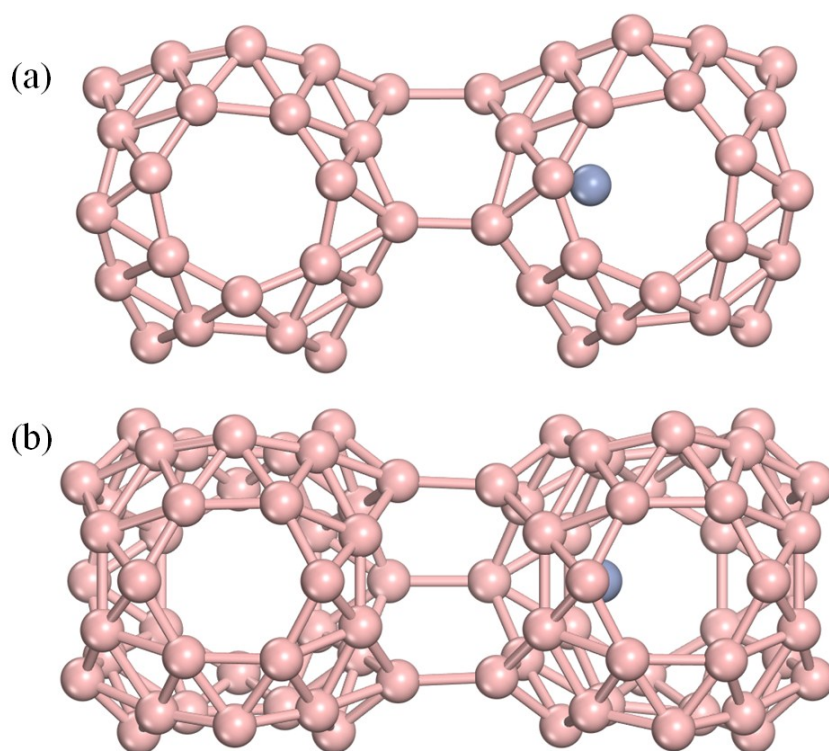

**Figure S2.** Optimized geometric structure of Cr-encapsulated  $B_{40}CrB_{40}$  cluster (a) top view, (b) side view.



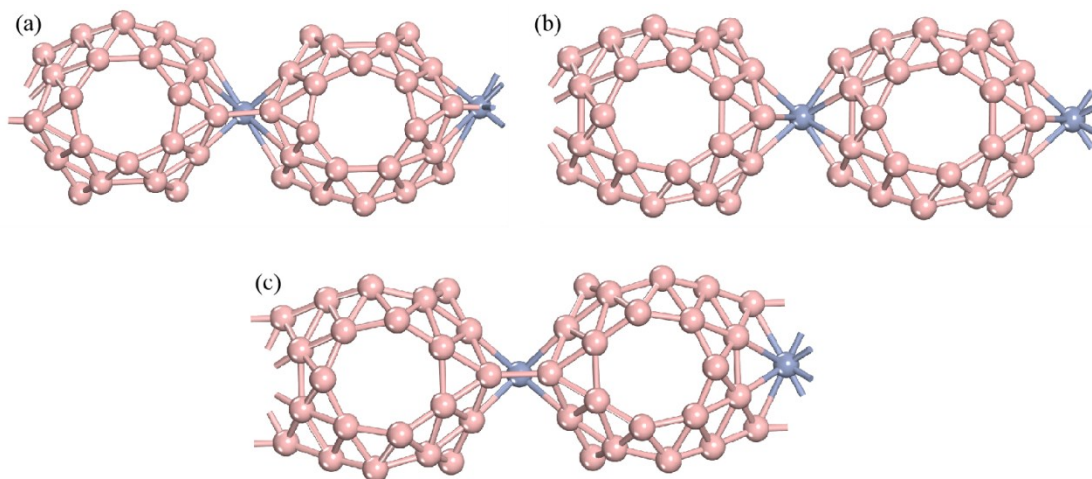

**Figure S3.** Optimized geometric structures of one-dimensional  $B_{40}Cr$  polymer isomers (a) placing the heptagon of  $B_{40}$  onto the antiparallel heptagon of another one with Cr located in the center; (b) stacking the hexagon of  $B_{40}$  onto the vertical hexagon of another with Cr lying in the center; (c) stacking the hexagon of  $B_{40}$  onto the parallel hexagon of another with Cr lying in the center.

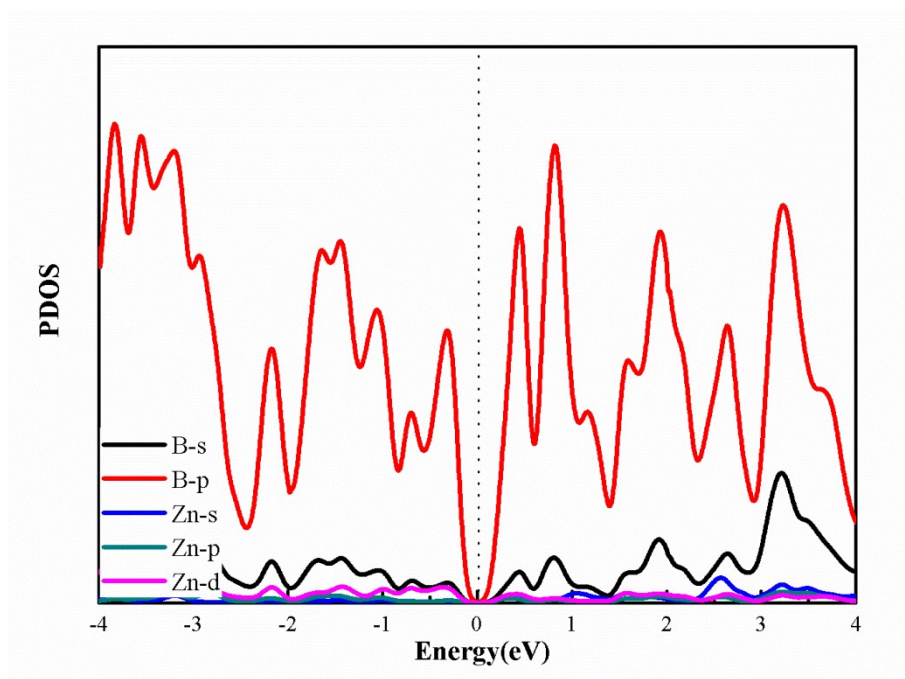

**Figure S4.** Projected density of states (PDOS) for 2D  $Zn_2B_{40}$ .
